# Supplementary material for: Novel peptide foldameric motifs: a step forward in our understanding of the fully-extended conformation/310-helix coexistence
Source: Royal Society of Chemistry journal article supplement (doi:10.1039/c2ob06863j), 2012-01-01
Supplement: c2ob06863j.pdf [file c2ob06863j.pdf]

Novel peptide foldameric motifs: a step forward in our understanding of  
the fully-extended conformation /  $3_{10}$ -helix coexistence

*Fernando Formaggio, Marco Crisma, Gema Ballano, Cristina Peggion,  
Mariano Venanzi, and Claudio Toniolo*

**SUPPORTING INFORMATION**

|                                                   |         |
|---------------------------------------------------|---------|
| X-Ray structure parameters and packing modes..... | S2-S7   |
| NMR spectra.....                                  | S8-S17  |
| Mass spectra.....                                 | S17-S20 |

Table S1. Selected torsion angles (°) for PyrAc-(Deg)<sub>2</sub>-O-(*p*NO<sub>2</sub>)Bzl

---

|                   |             |
|-------------------|-------------|
| C02-C01-C17-C0    | 123.5(6)    |
| C06-C01-C17-C0    | -55.8(12)   |
| C06'-C01'-C17'-C0 | -65(2)      |
| C02'-C01'-C17'-C0 | 119.7(10)   |
| C01-C17-C0-N1     | 146.7(6)    |
| C01'-C17'-C0-N1   | 155.9(10)   |
| C17-C0-N1-C1A     | 176.6(4)    |
| C17'-C0-N1-C1A    | 176.4(6)    |
| C0-N1-C1A-C1      | -171.32(14) |
| N1-C1A-C1B1-C1G1  | -53.3(2)    |
| N1-C1A-C1B2-C1G2  | 63.65(18)   |
| N1-C1A-C1-N2      | -169.49(12) |
| C1A-C1-N2-C2A     | -174.55(12) |
| C1-N2-C2A-C2      | -42.95(18)  |
| N2-C2A-C2B1-C2G1  | 175.58(17)  |
| N2-C2A-C2B2-C2G2  | 55.7(2)     |
| N2-C2A-C2-OT1     | -45.31(17)  |
| C2A-C2-OT1-CT1    | 172.55(15)  |
| C2-OT1-CT1-CT2    | -159.89(15) |
| OT1-CT1-CT2-CT7   | 90.6(2)     |
| OT1-CT1-CT2-CT3   | -89.24(19)  |
| CT6-CT5-NT1-OT2   | 5.5(3)      |
| CT4-CT5-NT1-OT3   | 4.9(3)      |

---

Table S2. Selected torsion angles (°) for PyrAc-(Deg)<sub>5</sub>-O-(pNO<sub>2</sub>)Bzl

---

|                  |           |
|------------------|-----------|
| C06-C01-C17-C0   | 80.3(4)   |
| C02-C01-C17-C0   | -96.9(4)  |
| C01-C17-C0-N1    | -154.8(3) |
| C17-C0-N1-C1A    | -173.7(2) |
| C0-N1-C1A-C1     | -53.8(3)  |
| N1-C1A-C1B1-C1G1 | 177.8(3)  |
| N1-C1A-C1B2-C1G2 | 58.4(4)   |
| N1-C1A-C1-N2     | -41.7(3)  |
| C1A-C1-N2-C2A    | -174.6(3) |
| C1-N2-C2A-C2     | -55.0(4)  |
| N2-C2A-C2B1-C2G1 | 179.5(4)  |
| N2-C2A-C2B2-C2G2 | 58.8(4)   |
| N2-C2A-C2-N3     | -31.5(3)  |
| C2A-C2-N3-C3A    | -173.1(2) |
| C2-N3-C3A-C3     | -53.4(3)  |
| N3-C3A-C3B1-C3G1 | -179.4(4) |
| N3-C3A-C3B2-C3G2 | 60.9(5)   |
| N3-C3A-C3-N4     | -34.8(3)  |
| C3A-C3-N4-C4A    | -175.9(2) |
| C3-N4-C4A-C4     | -59.2(3)  |
| N4-C4A-C4B1-C4G1 | -169.4(3) |
| N4-C4A-C4B2-C4G2 | 59.8(4)   |
| N4-C4A-C4-N5     | -31.5(3)  |
| C4A-C4-N5-C5A    | 175.2(2)  |
| C4-N5-C5A-C5     | 49.9(3)   |
| N5-C5A-C5B1-C5G1 | -69.9(3)  |
| N5-C5A-C5B2-C5G2 | -175.1(3) |
| N5-C5A-C5-OT1    | 54.8(3)   |
| C5A-C5-OT1-CT1   | 159.6(3)  |
| C5-OT1-CT1-CT2   | 140.9(3)  |
| OT1-CT1-CT2-CT7  | -14.9(6)  |
| OT1-CT1-CT2-CT3  | 166.0(3)  |

---

Table S3. Selected torsion angles (°) for PyrAc-(Aib)<sub>5</sub>-OtBu

---

|                |             |
|----------------|-------------|
| C02-C01-C17-C0 | -96.82(15)  |
| C06-C01-C17-C0 | 78.99(15)   |
| C01-C17-C0-N1  | 107.95(13)  |
| C17-C0-N1-C1A  | -176.03(12) |
| C0-N1-C1A-C1   | 55.39(16)   |
| N1-C1A-C1-N2   | 31.35(16)   |
| C1A-C1-N2-C2A  | 173.84(11)  |
| C1-N2-C2A-C2   | 54.97(16)   |
| N2-C2A-C2-N3   | 30.43(16)   |
| C2A-C2-N3-C3A  | 178.43(12)  |
| C2-N3-C3A-C3   | 52.05(19)   |
| N3-C3A-C3-N4   | 35.79(19)   |
| C3A-C3-N4-C4A  | 175.23(12)  |
| C3-N4-C4A-C4   | 57.90(15)   |
| N4-C4A-C4-N5   | 37.55(16)   |
| C4A-C4-N5-C5A  | 170.16(12)  |
| C4-N5-C5A-C5   | -49.30(17)  |
| N5-C5A-C5-OT   | -43.22(15)  |
| C5A-C5-OT-CT1  | -174.68(12) |
| C5-OT-CT1-CT2  | -60.5(2)    |
| C5-OT-CT1-CT4  | -178.6(2)   |
| C5-OT-CT1-CT3  | 62.1(2)     |

---

Table S4. Hydrogen bonds for PyrAc-(Deg)<sub>2</sub>-O-(*p*NO<sub>2</sub>)Bzl [ $\text{\AA}$  and  $^\circ$ ].

| D-H...A      | d(D-H) | d(H...A) | d(D...A)   | <(DHA) |
|--------------|--------|----------|------------|--------|
| N1-H1...O1   | 0.86   | 2.13     | 2.5669(17) | 110.8  |
| N2-H2...O0#1 | 0.86   | 2.25     | 3.0845(15) | 165.3  |

Symmetry transformations used to generate equivalent atoms:

#1  $-x+1/2, y-1/2, -z+3/2$

Table S5. Hydrogen bonds for PyrAc-(Deg)<sub>5</sub>-O-(*p*NO<sub>2</sub>)Bzl [ $\text{\AA}$  and  $^\circ$ ].

| D-H...A      | d(D-H) | d(H...A) | d(D...A) | <(DHA) |
|--------------|--------|----------|----------|--------|
| N3-H3...O0   | 0.86   | 2.20     | 2.996(3) | 154.7  |
| N4-H4...O1   | 0.86   | 2.40     | 3.218(3) | 158.2  |
| N5-H5...O2   | 0.86   | 2.22     | 2.951(3) | 143.2  |
| N1-H1...O4#1 | 0.86   | 2.00     | 2.862(3) | 174.0  |

Symmetry transformations used to generate equivalent atoms:

#1  $x, y, z+1$

Table S6. Hydrogen bonds for PyrAc-(Aib)<sub>5</sub>-O*t*Bu

| D-H...A      | d(D-H) | d(H...A) | d(D...A)   | <(DHA) |
|--------------|--------|----------|------------|--------|
| N3-H3...O0   | 0.86   | 2.32     | 3.1407(14) | 159.2  |
| N4-H4...O1   | 0.86   | 2.19     | 2.9973(13) | 156.4  |
| N5-H5...O2   | 0.86   | 2.26     | 3.0335(14) | 149.8  |
| N1-H1...O4#1 | 0.86   | 2.09     | 2.9212(14) | 161.9  |

Symmetry transformations used to generate equivalent atoms:

#1  $x+1, y, z$

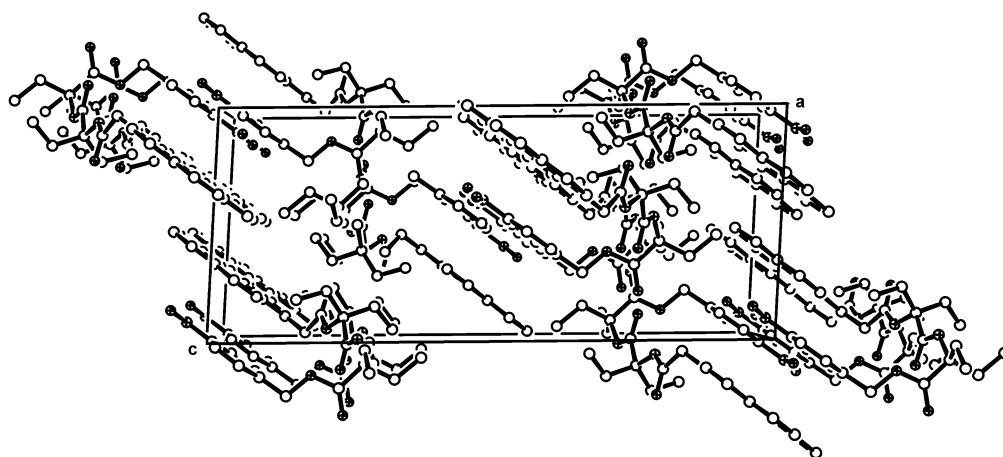

Figure S1 – Packing mode of PyrAc-(Deg)<sub>2</sub>-O-(pNO<sub>2</sub>)Bzl as viewed down the *b* axis.

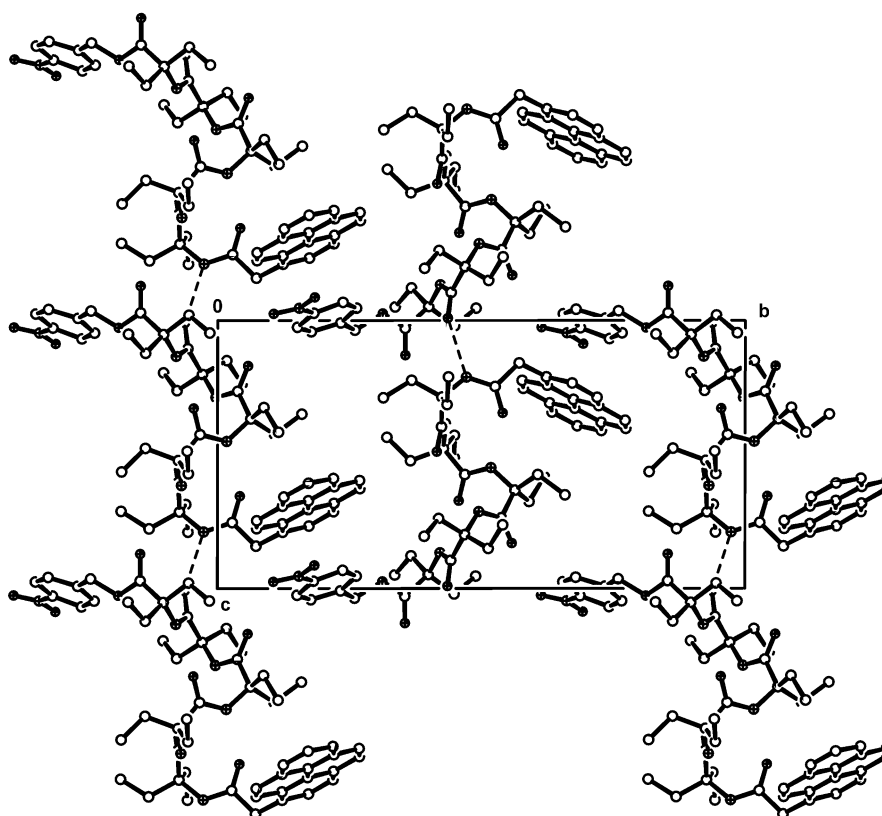

Figure S2 – Packing mode of PyrAc-(Deg)<sub>5</sub>-O-(pNO<sub>2</sub>)Bzl as viewed down the *a* axis. The intermolecular H-bonds are indicated by dashed lines.

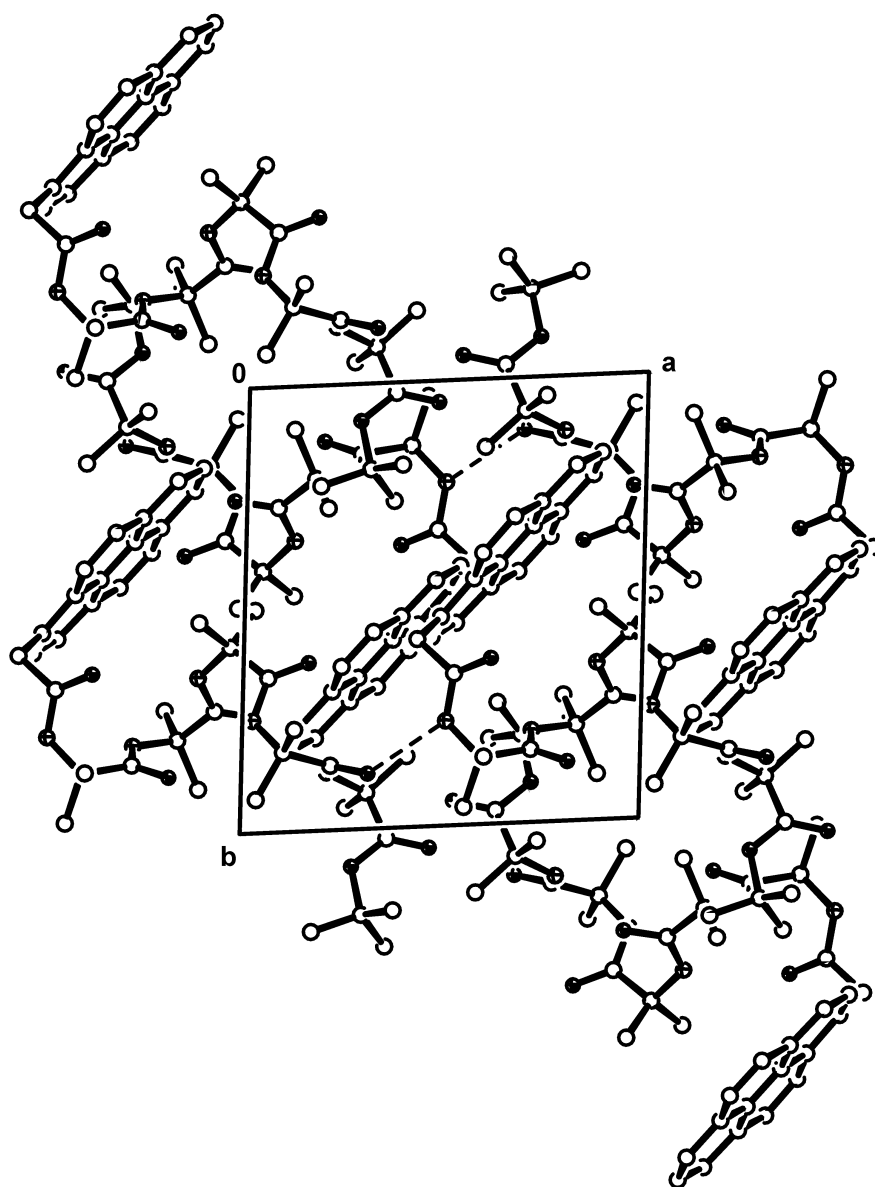

Figure S3 – Packing mode of PyrAc-(Aib)<sub>5</sub>-OtBu as viewed down the *c* axis. The intermolecular H-bonds are indicated by dashed lines.

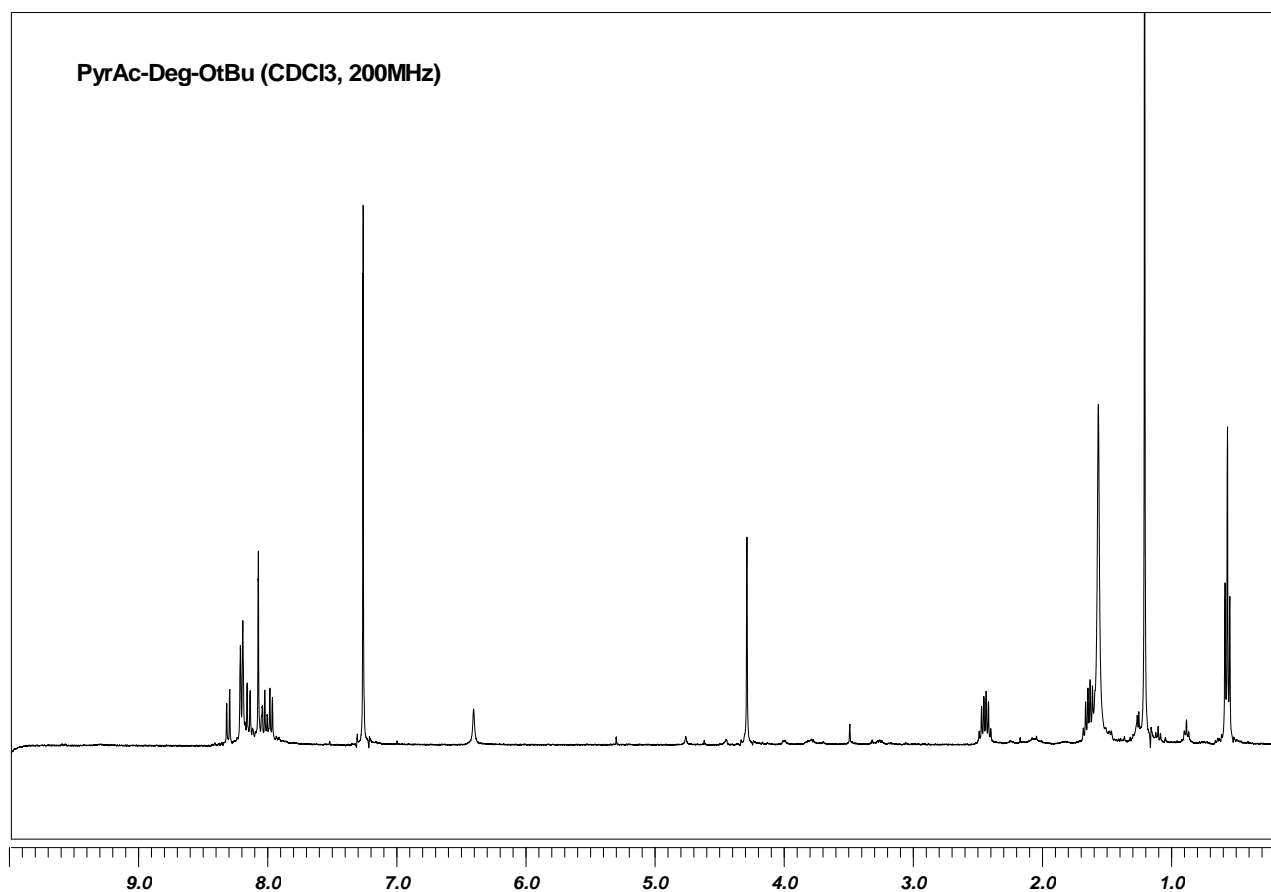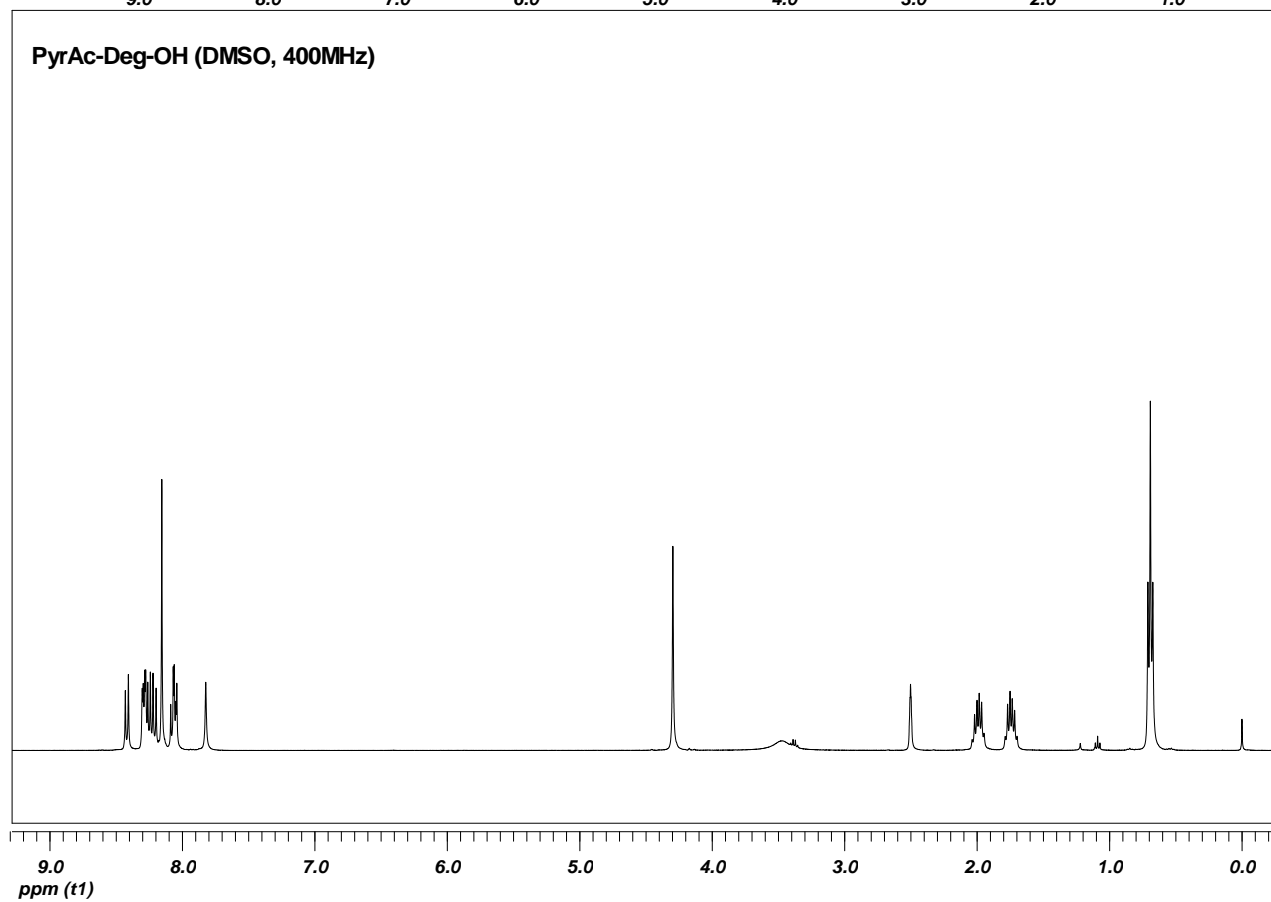



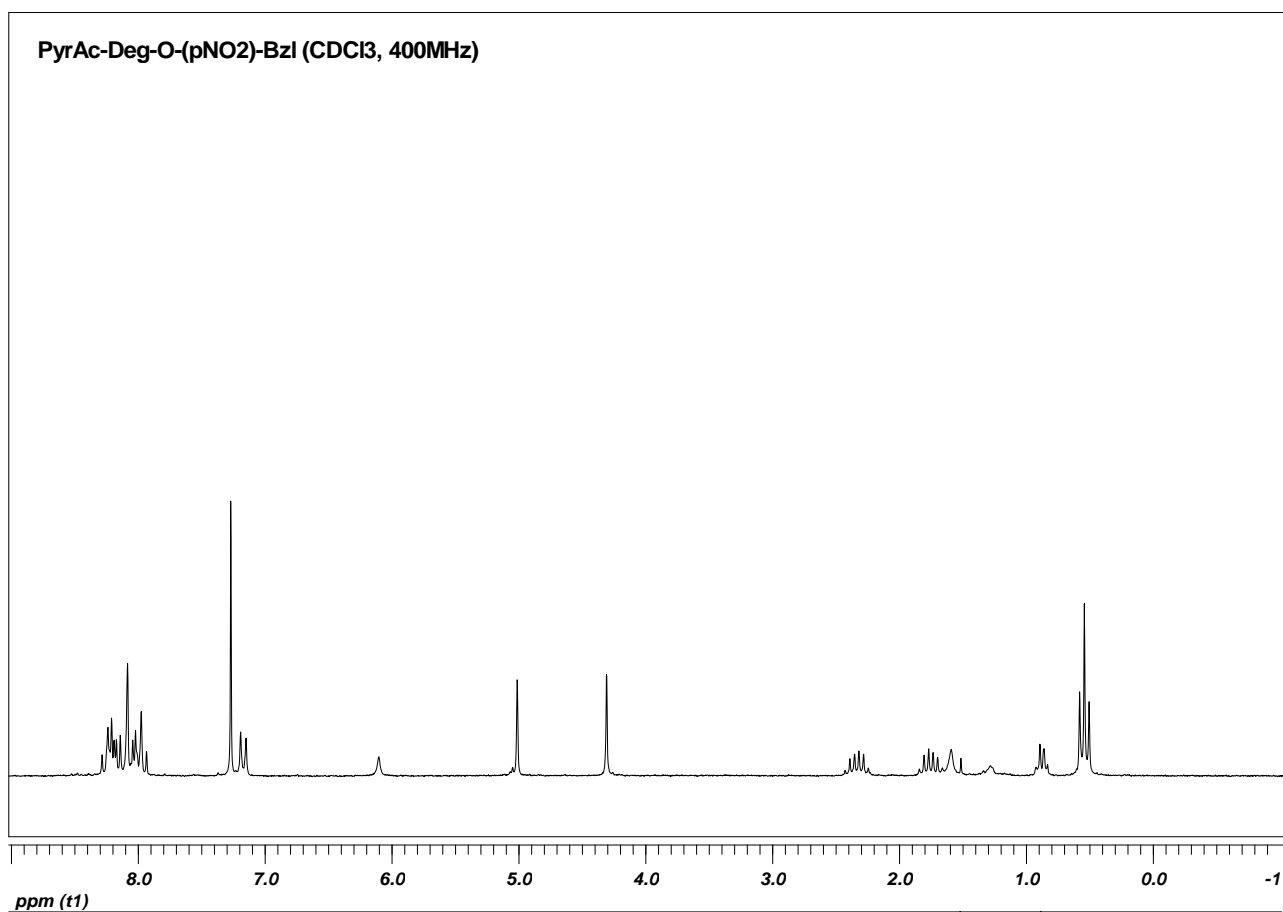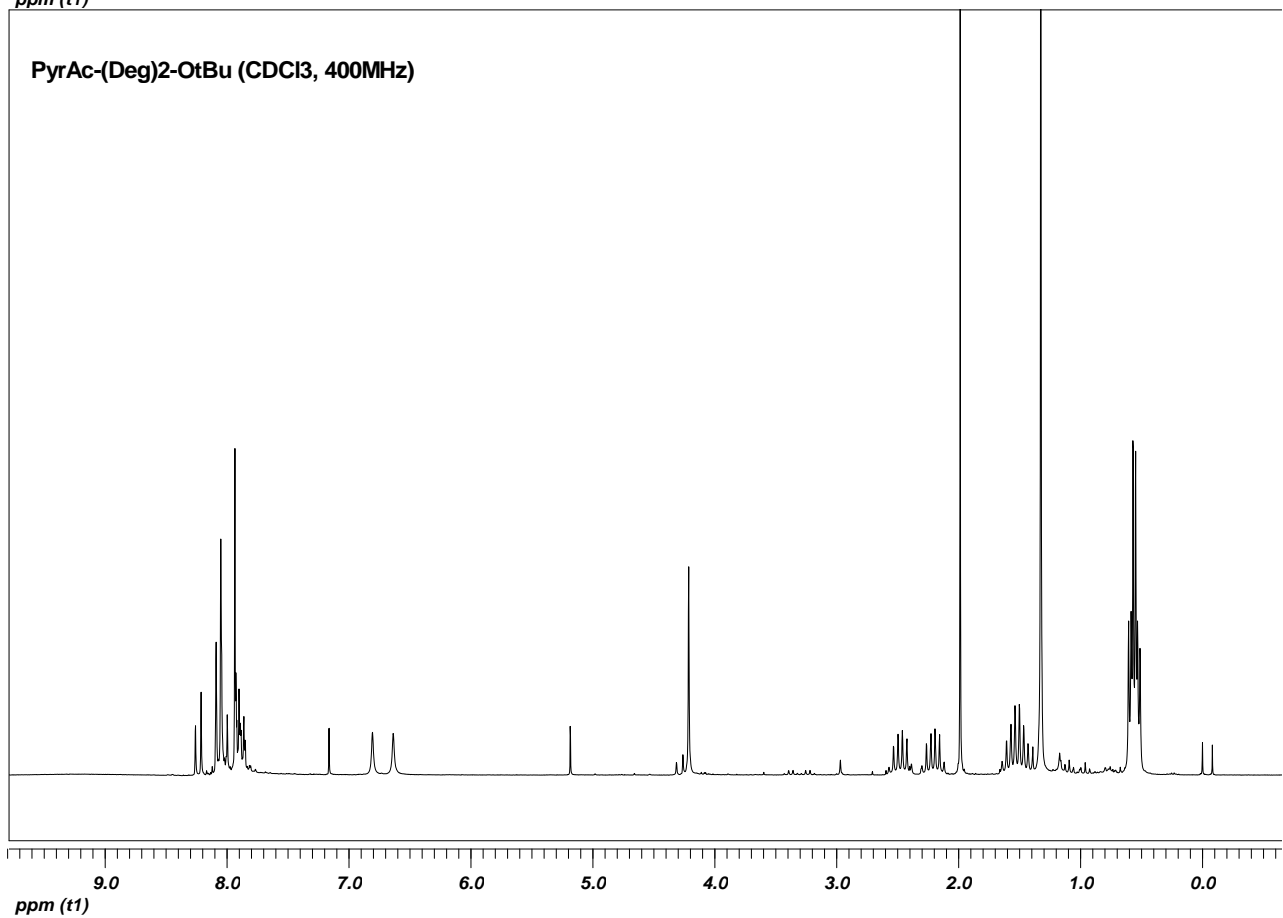

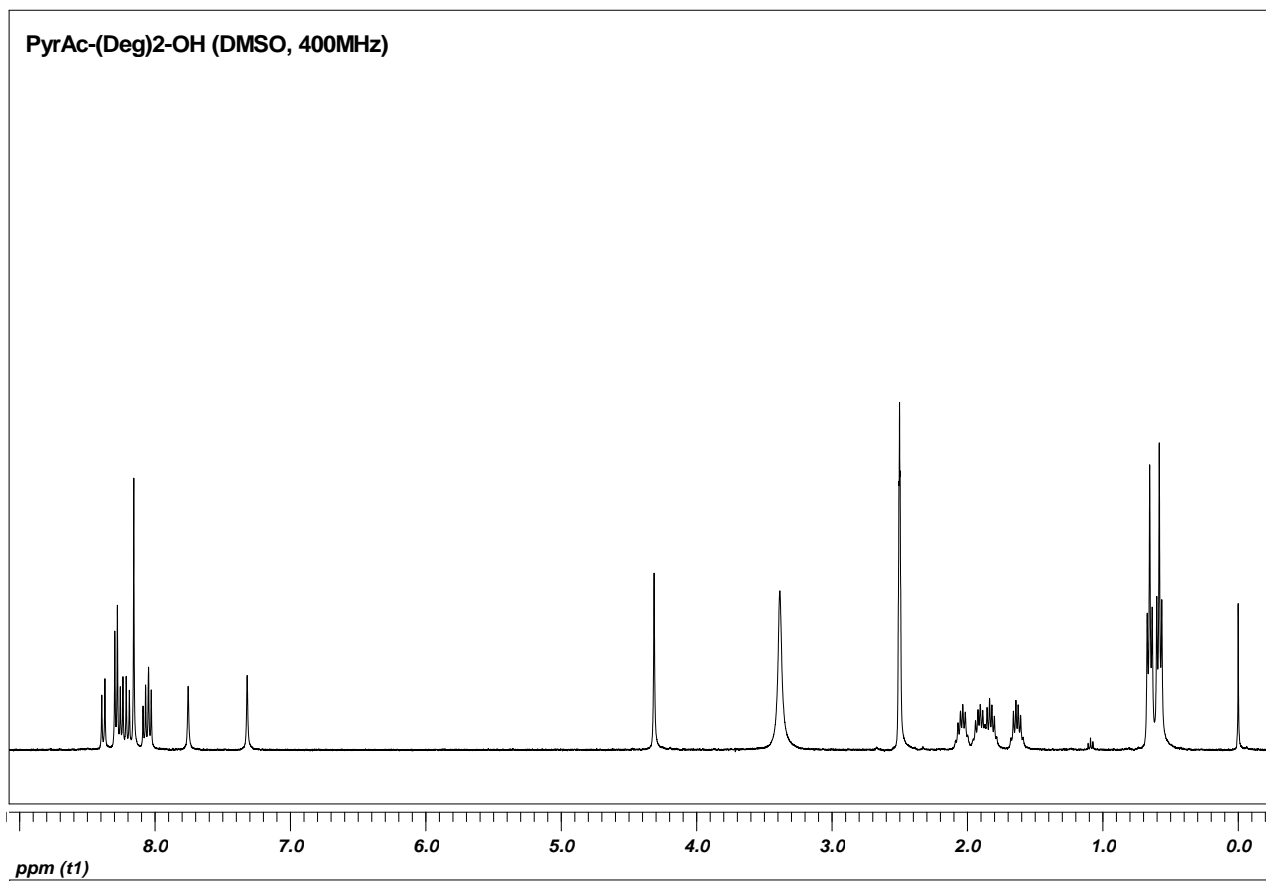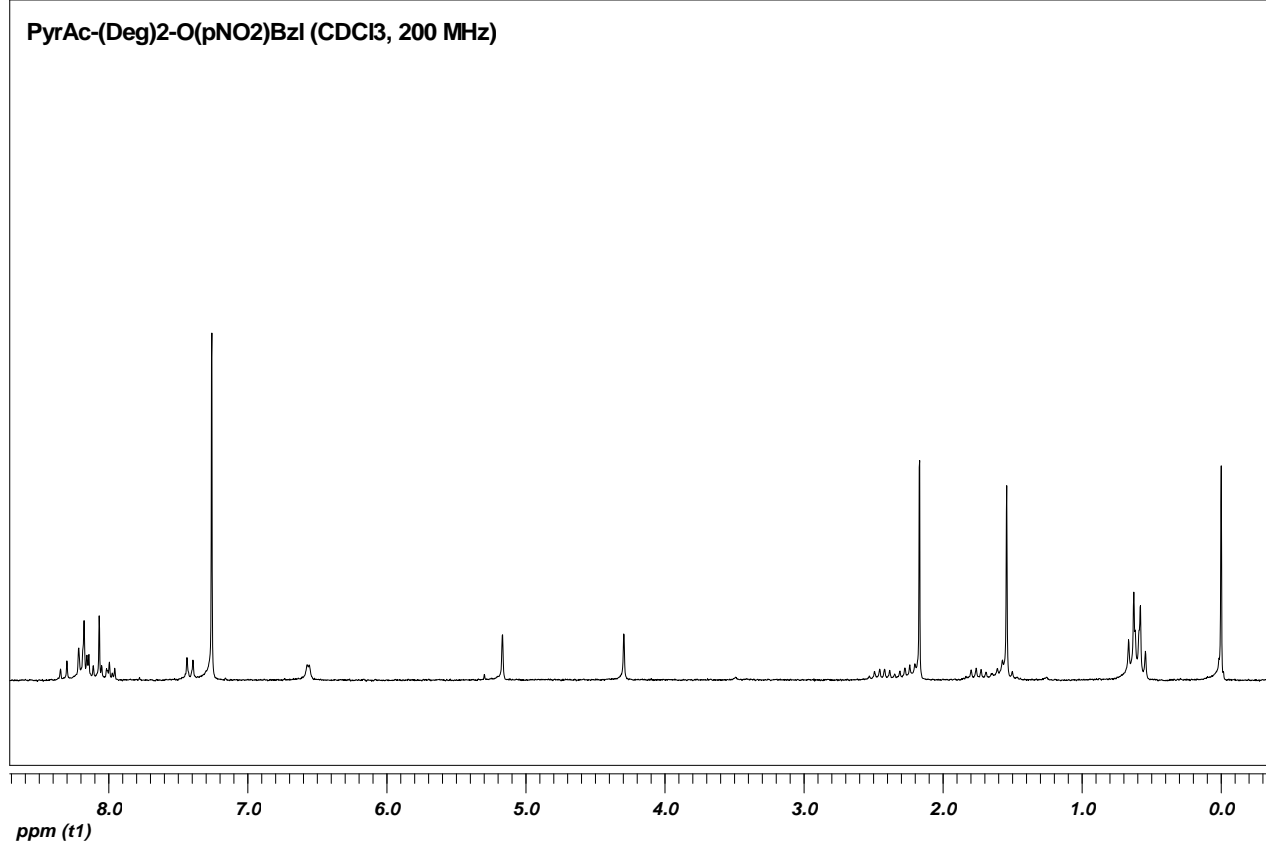

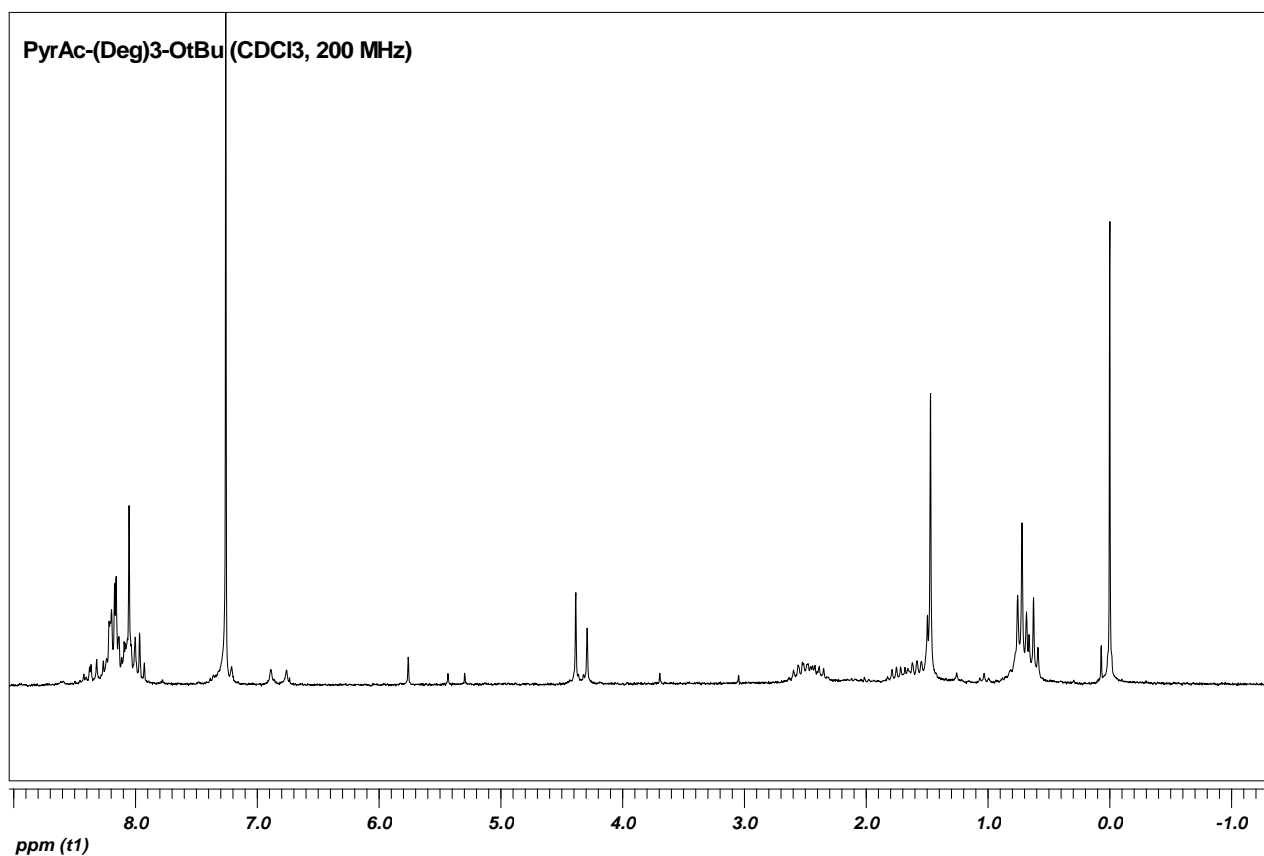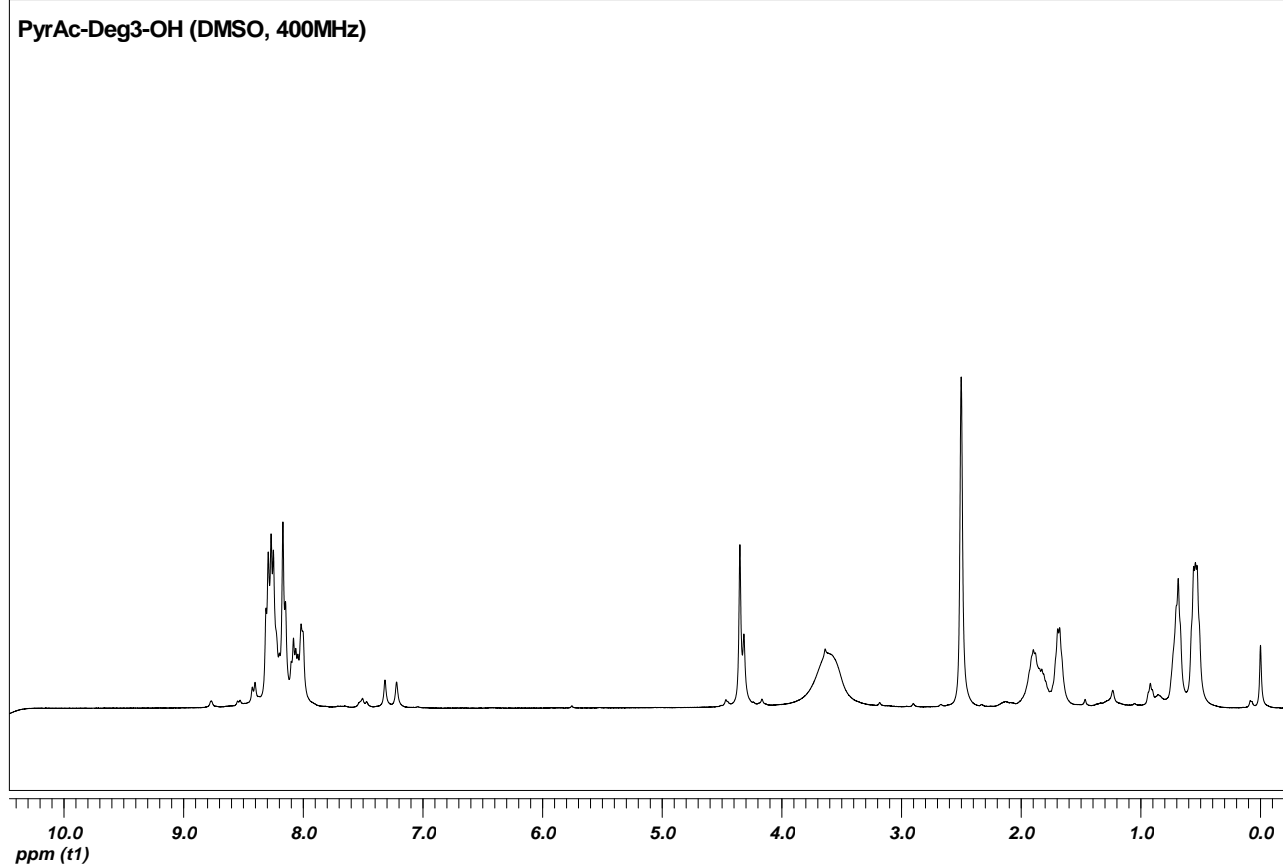

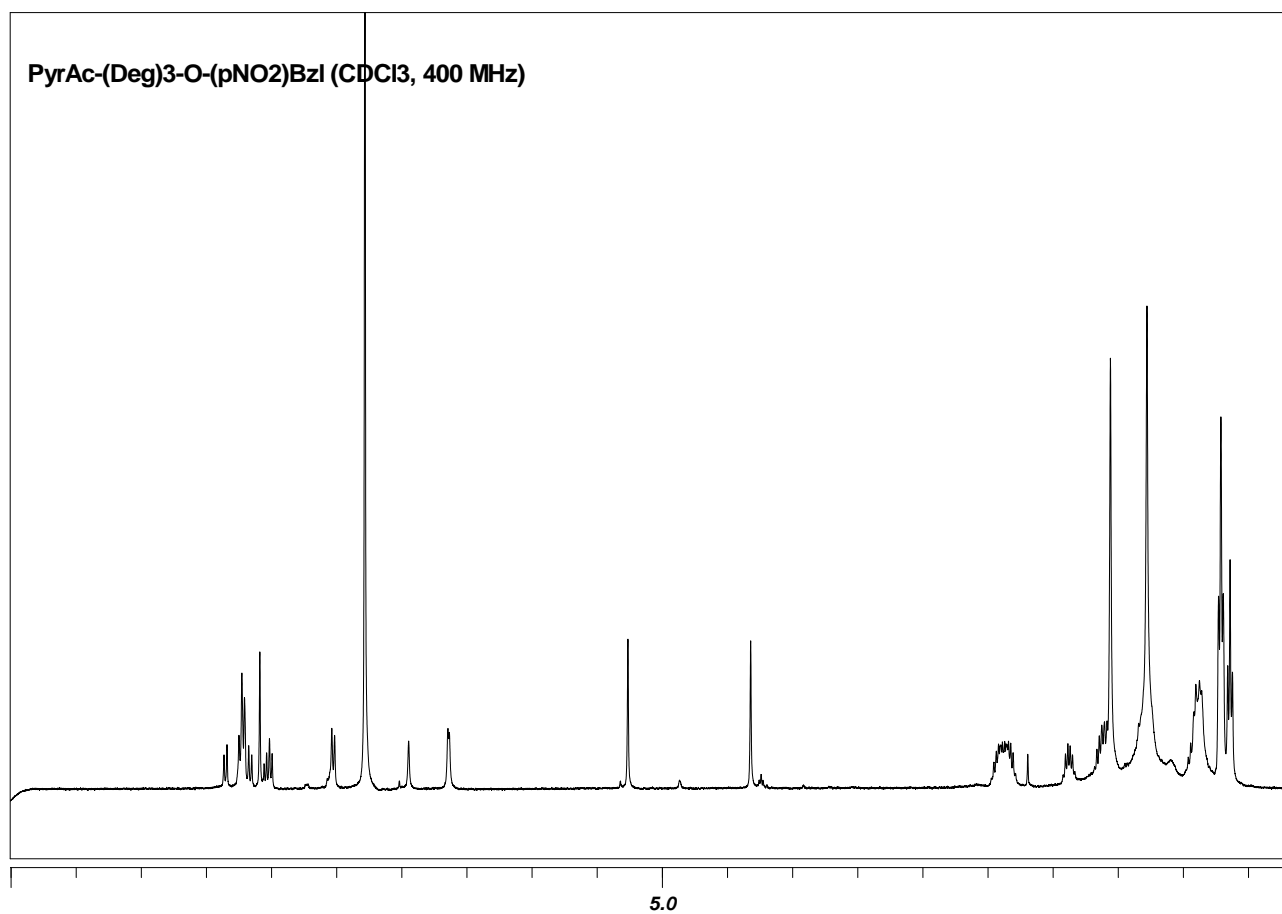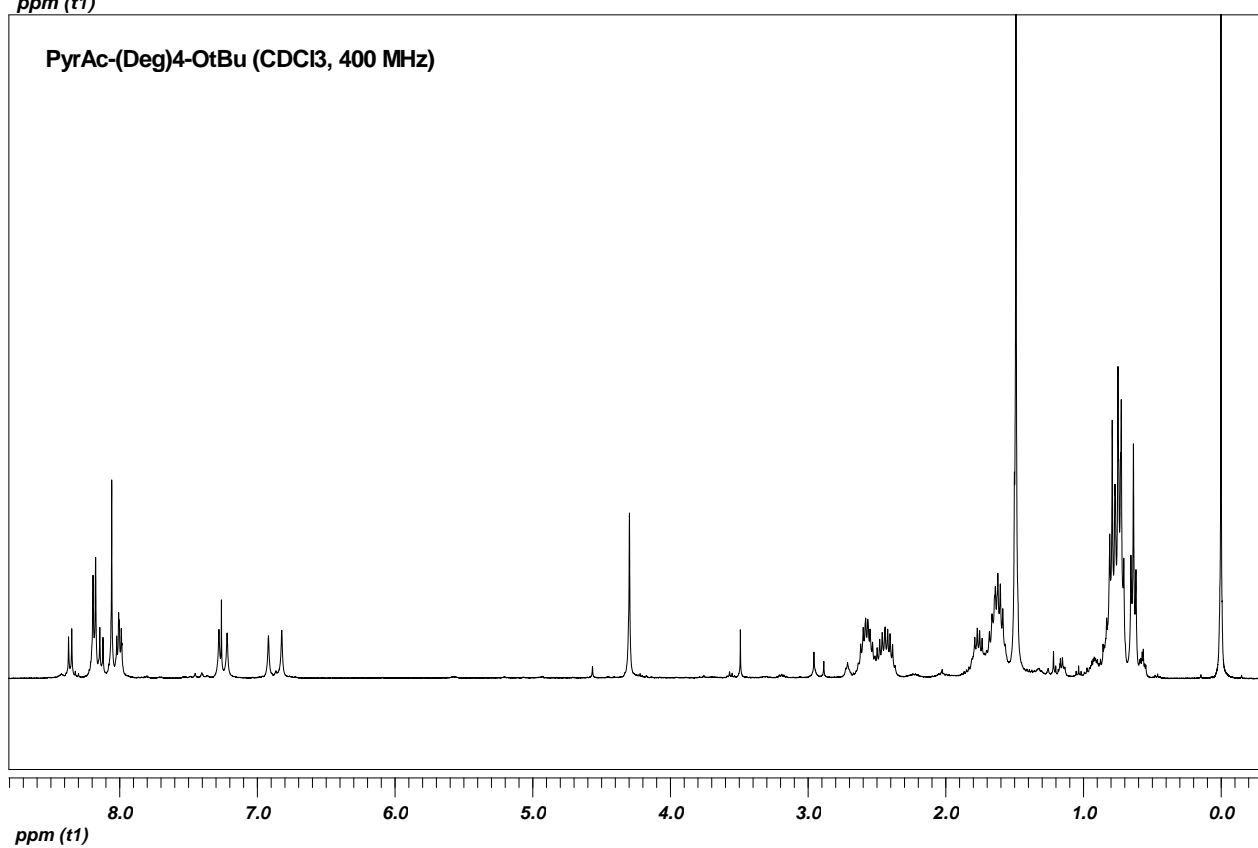

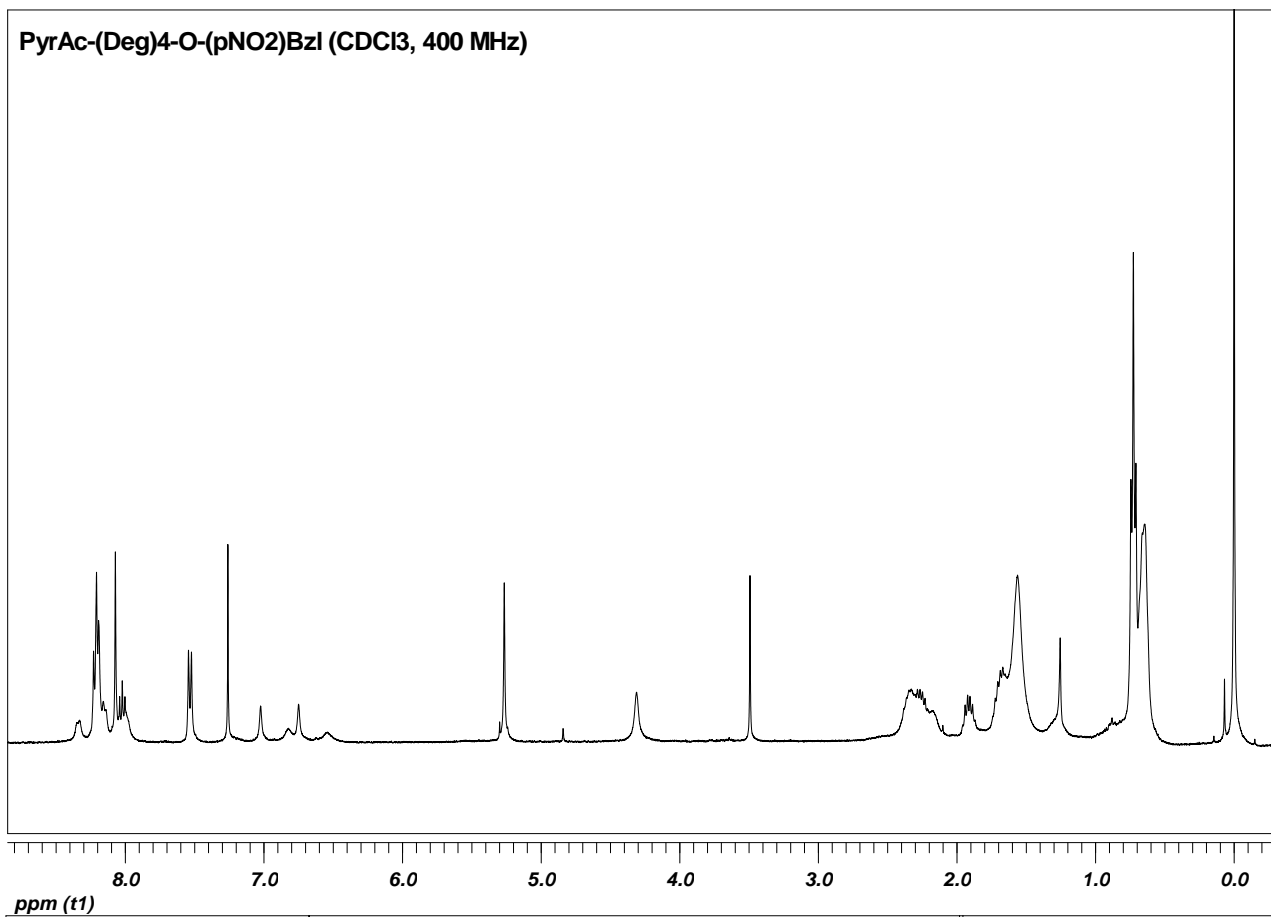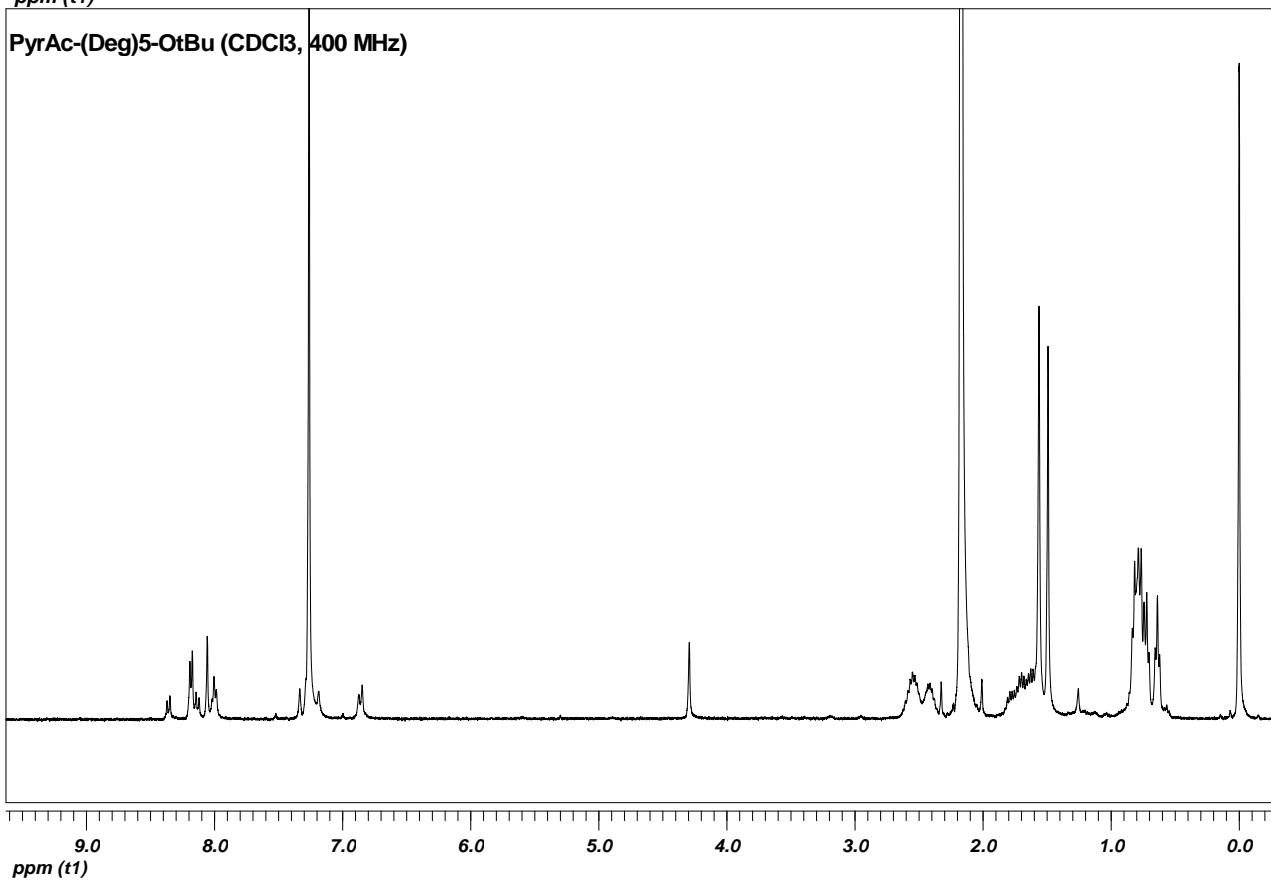

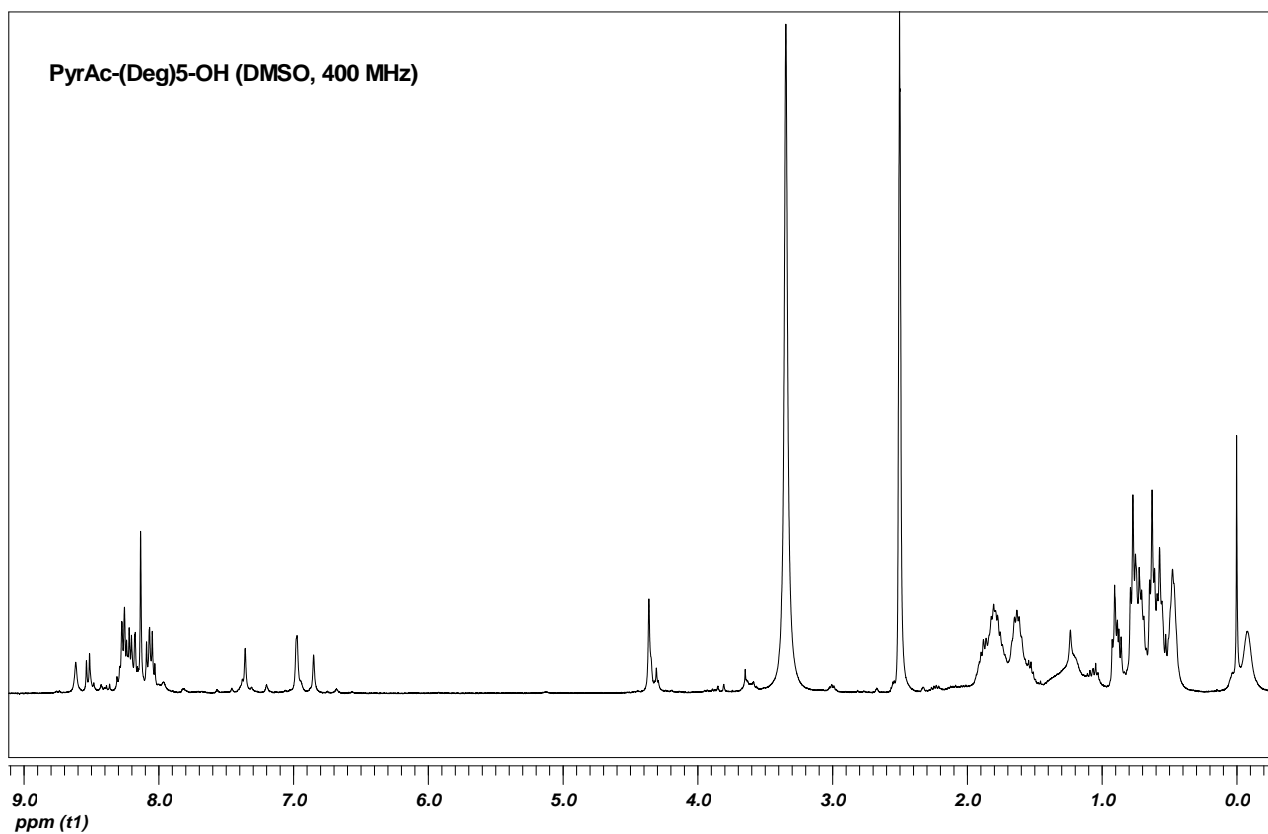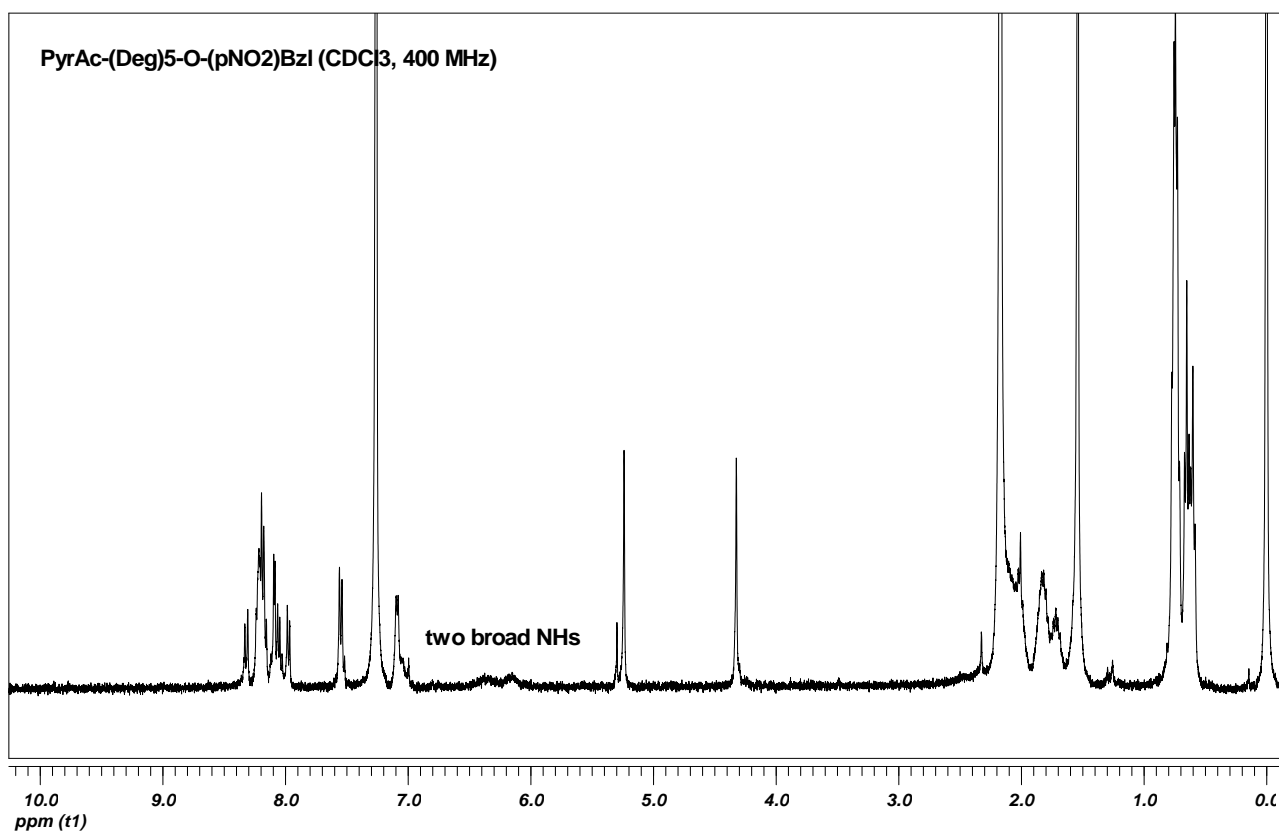

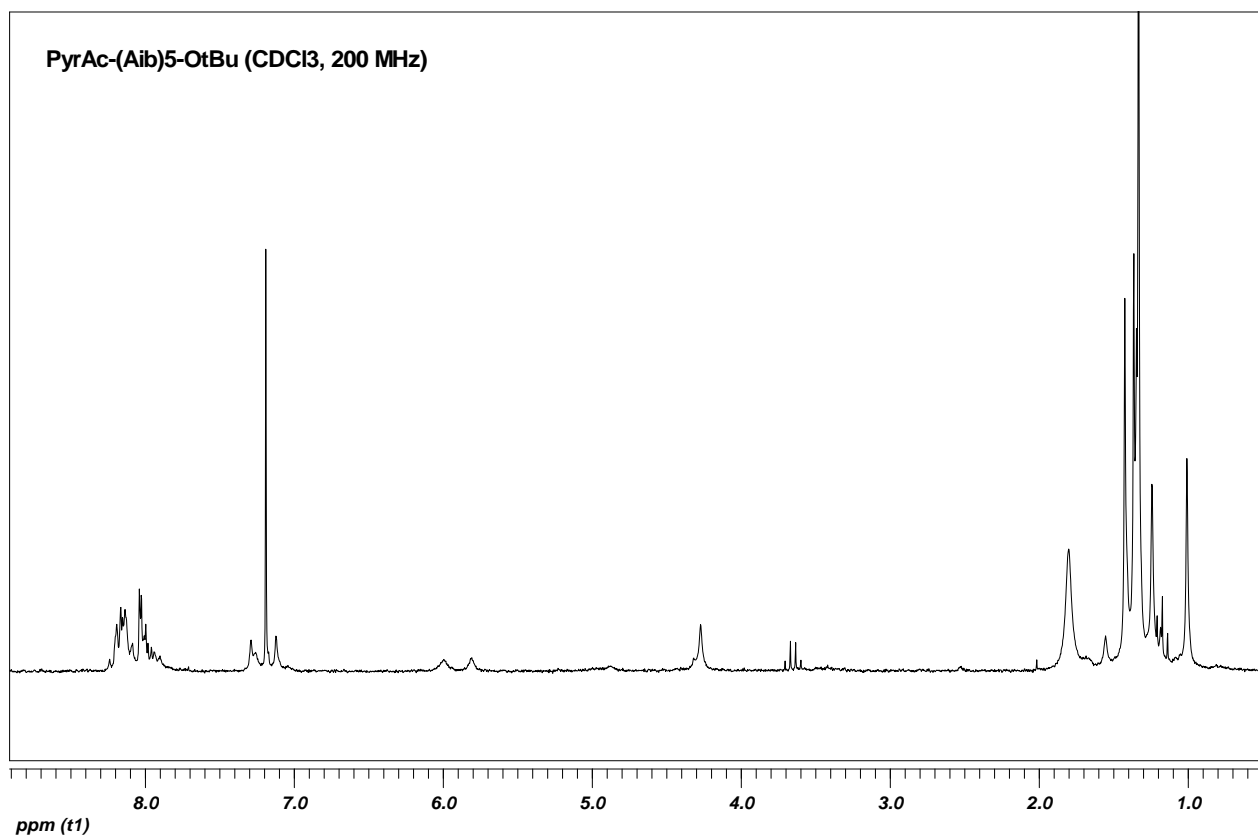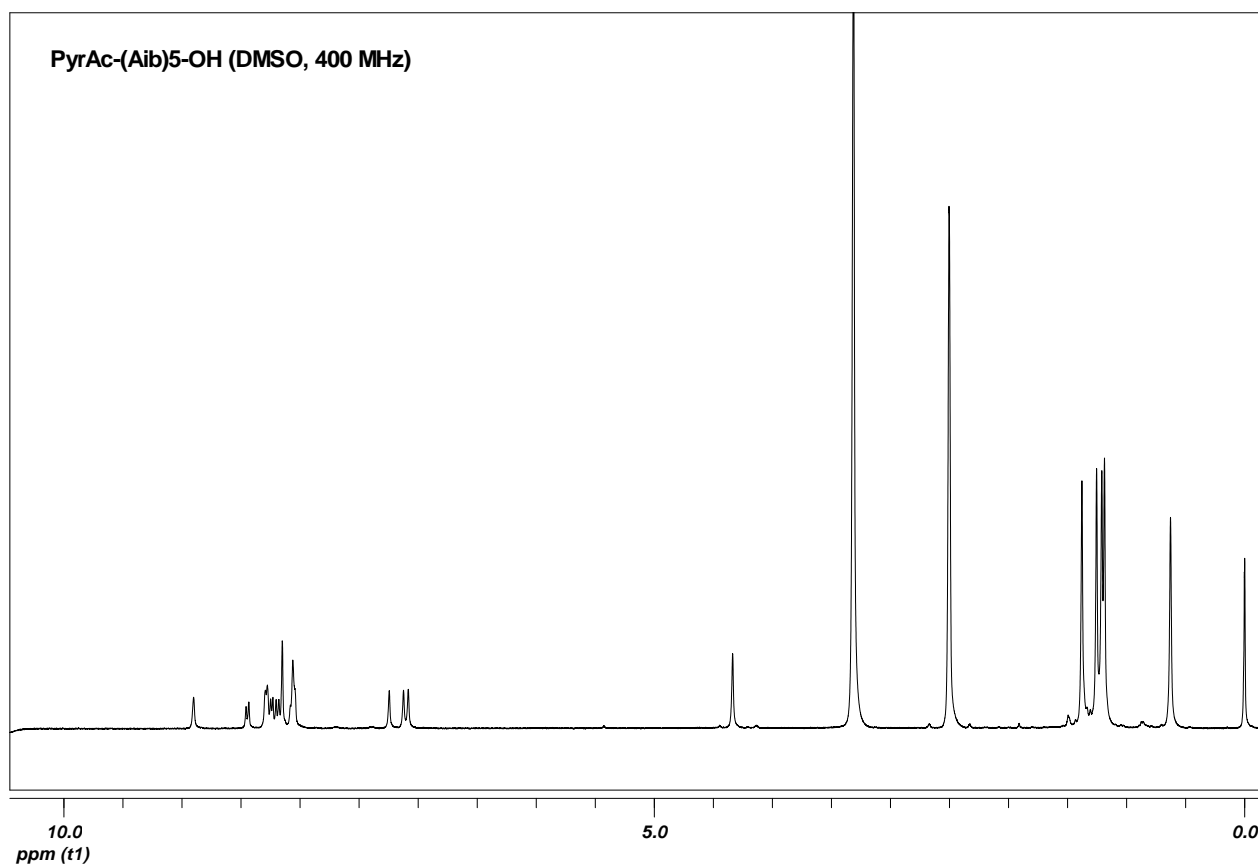

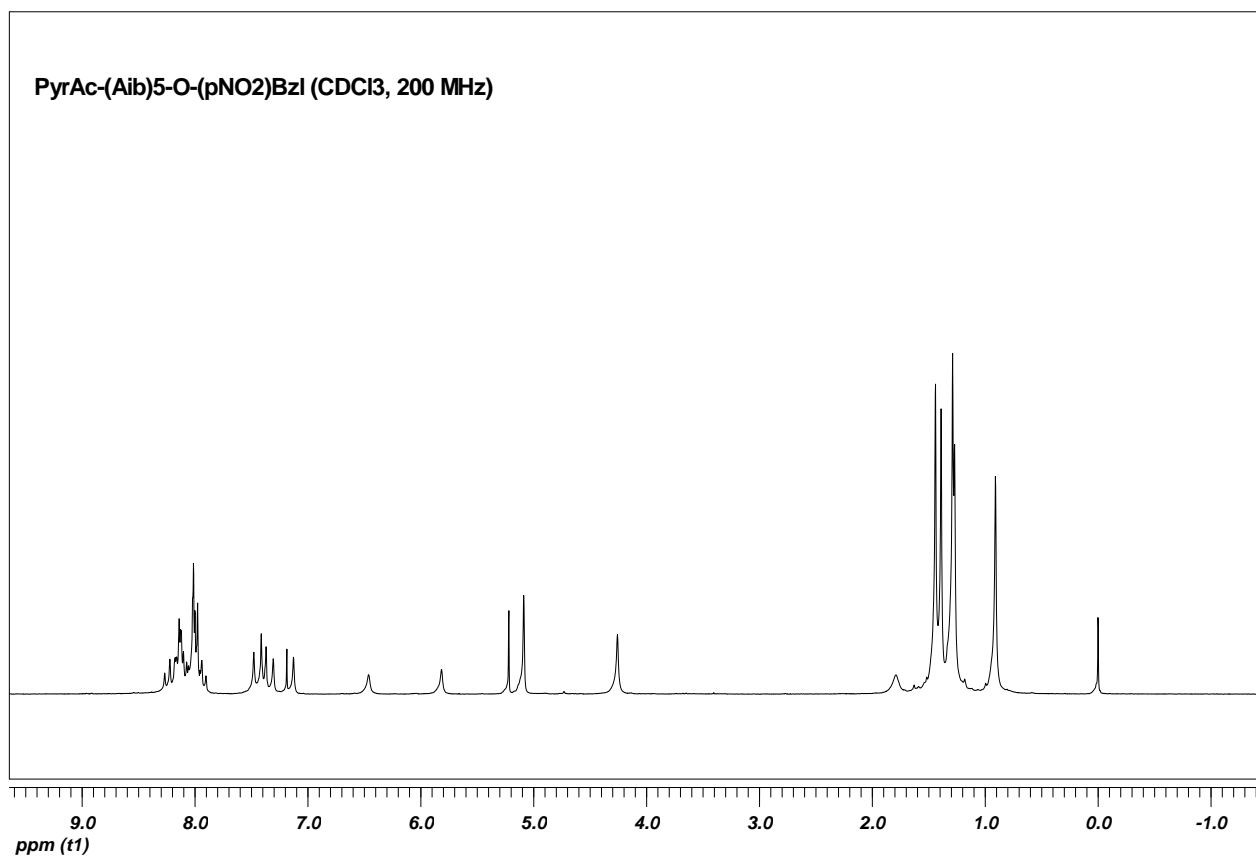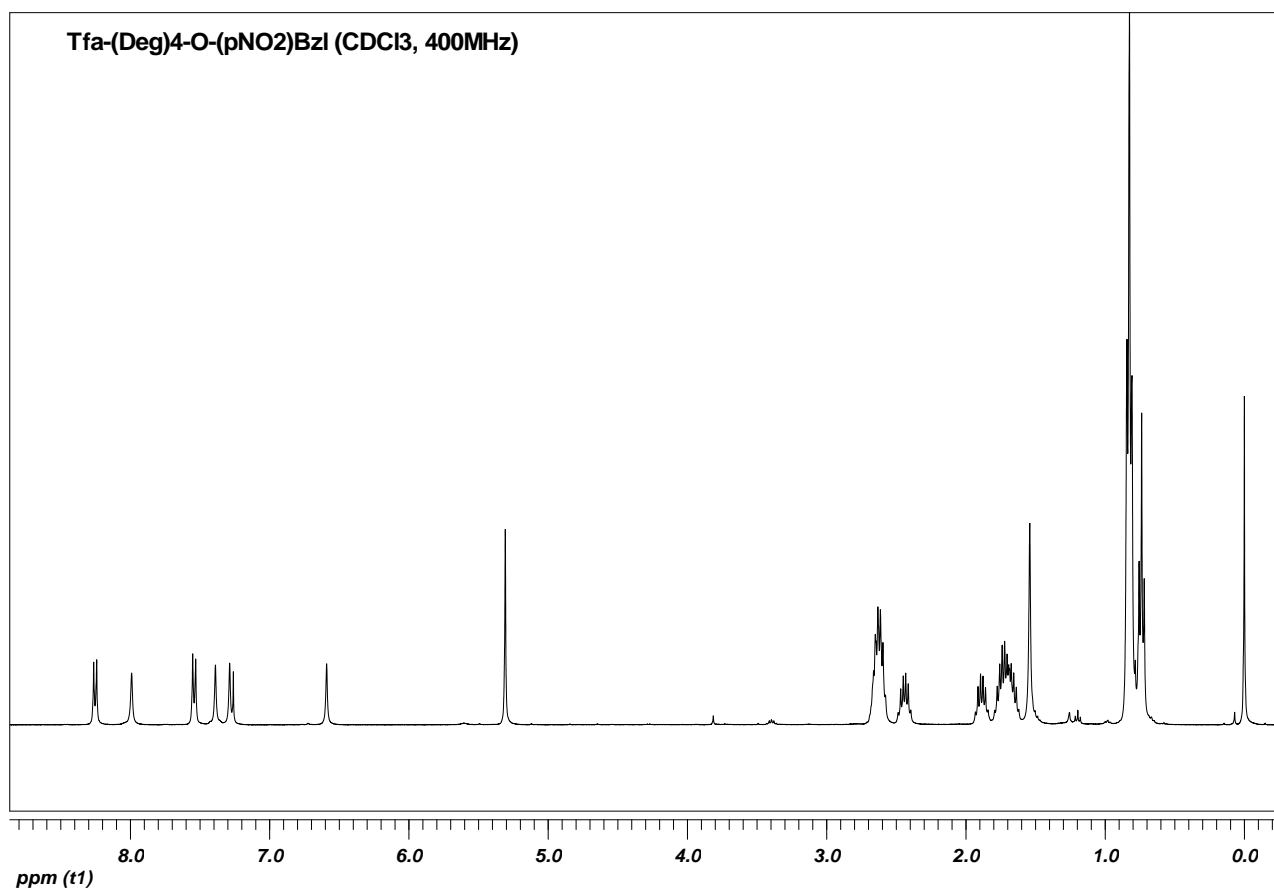



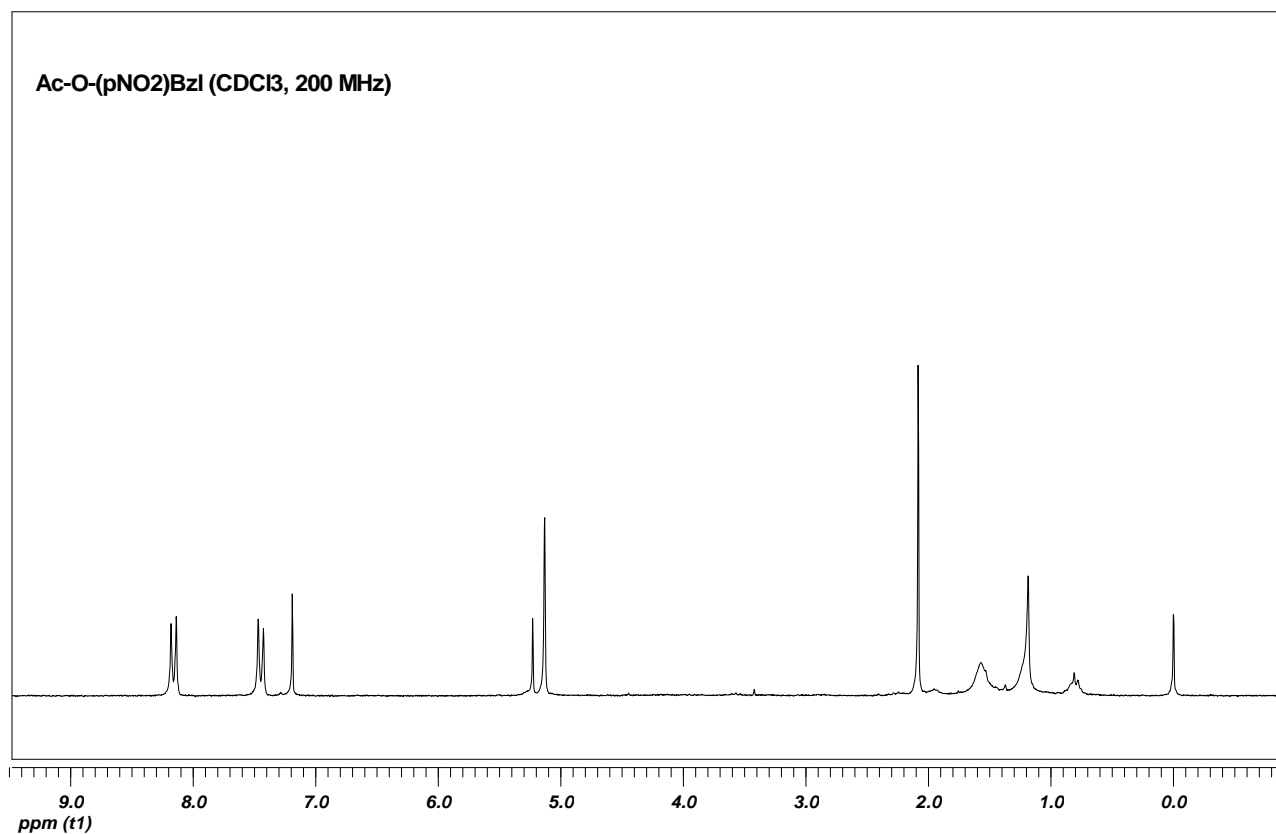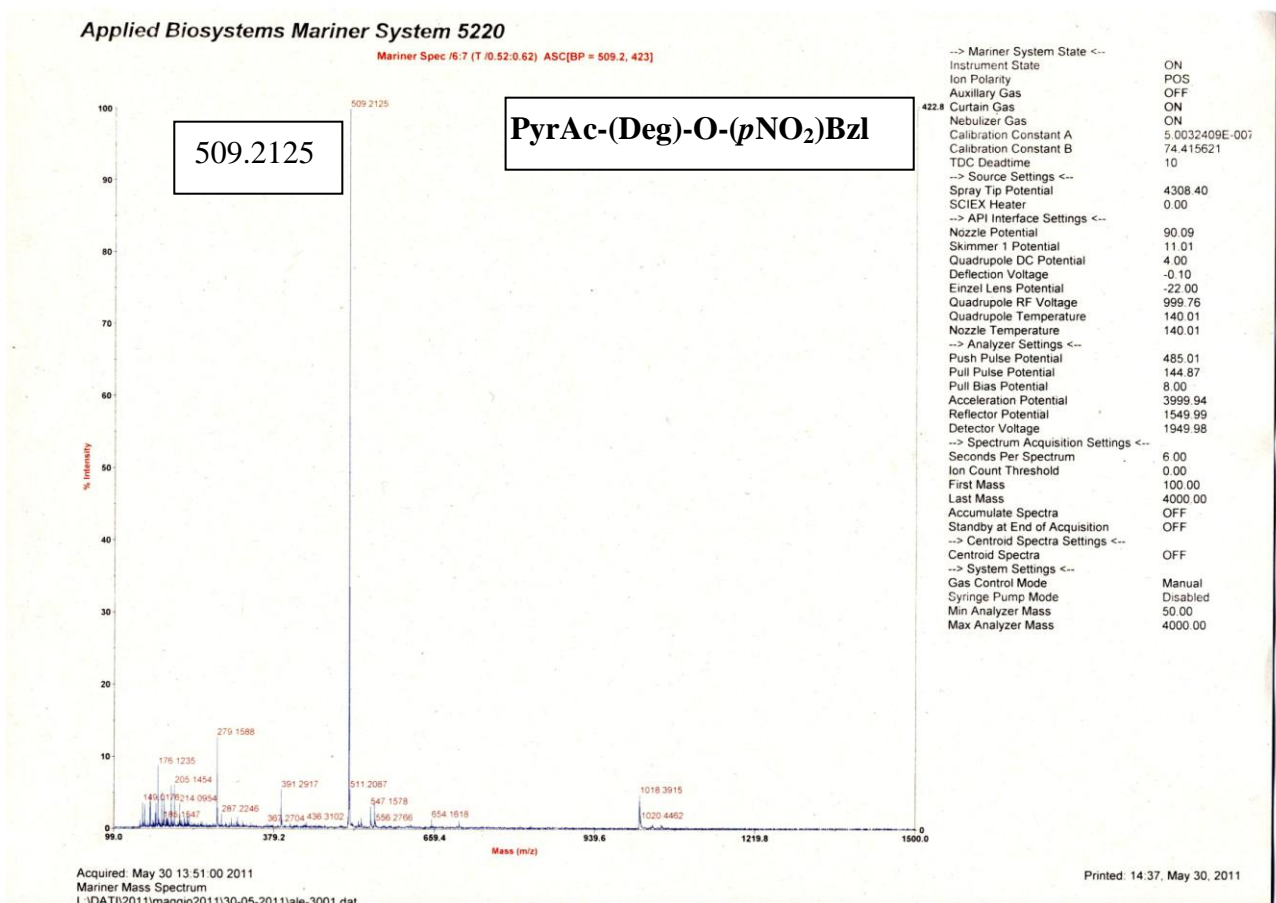

Applied Biosystems Mariner System 5220

Mariner Spec 7:8 (T /0.62:0.73) ASC[BP = 622.3, 2311]

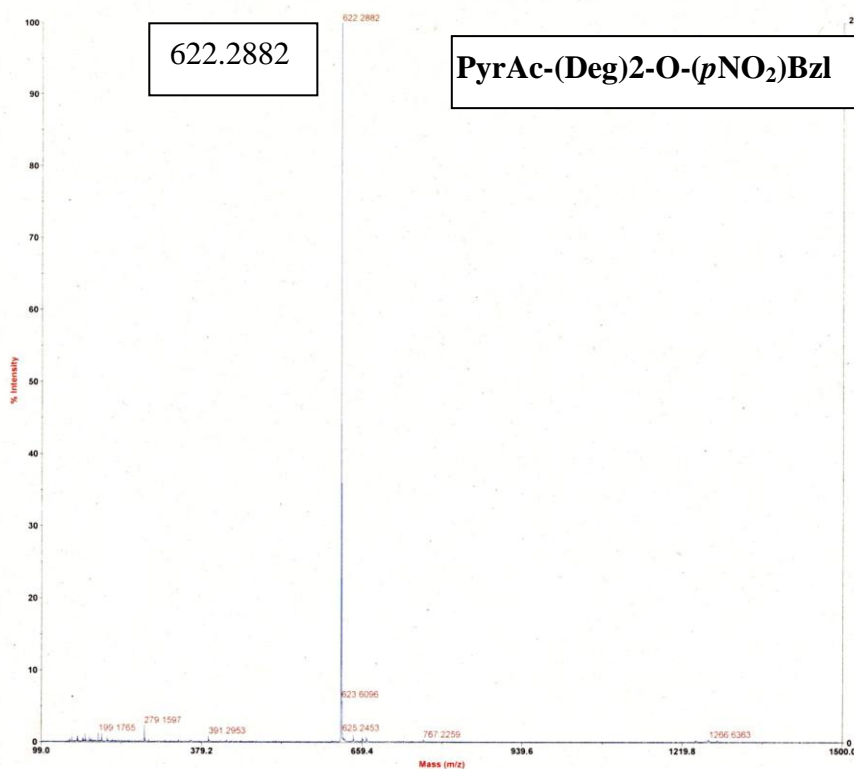

Acquired: May 30 13:53:00 2011  
 Mariner Mass Spectrum  
 L:\DATA\2011\maggio2011\30-05-2011\ale-4001.dat

Printed: 14:38, May 30, 2011

```

--> Mariner System State <--
Instrument State      POS
Ion Polarity         OFF
Auxiliary Gas        ON
Curtain Gas          ON
Nebulizer Gas        ON
Calibration Constant A 5.0032409E-007
Calibration Constant B 74.415621
TDC Deadtime         10
--> Source Settings <--
Spray Tip Potential   4308.40
SCIEX Heater         0.00
--> API Interface Settings <--
Nozzle Potential     90.09
Skimmer 1 Potential  11.01
Quadrupole DC Potential 4.00
Deflection Voltage   -0.10
Einzel Lens Potential -22.00
Quadrupole RF Voltage 999.76
Quadrupole Temperature 140.01
Nozzle Temperature   140.01
--> Analyzer Settings <--
Push Pulse Potential 485.01
Pull Pulse Potential 144.87
Pull Bias Potential   8.00
Acceleration Potential 3999.94
Reflector Potential   1549.99
Detector Voltage      1949.98
--> Spectrum Acquisition Settings <--
Seconds Per Spectrum 6.00
Ion Count Threshold   0.00
First Mass            100.00
Last Mass             4000.00
Accumulate Spectra   OFF
Standby at End of Acquisition OFF
--> Centroid Spectra Settings <--
Centroid Spectra     OFF
--> System Settings <--
Gas Control Mode     Manual
Syringe Pump Mode    Disabled
Min Analyzer Mass     50.00
Max Analyzer Mass     4000.00
    
```

Applied Biosystems Mariner System 5220

Mariner Spec 7:8 (T /0.62:0.73) ASC[BP = 735.4, 977]

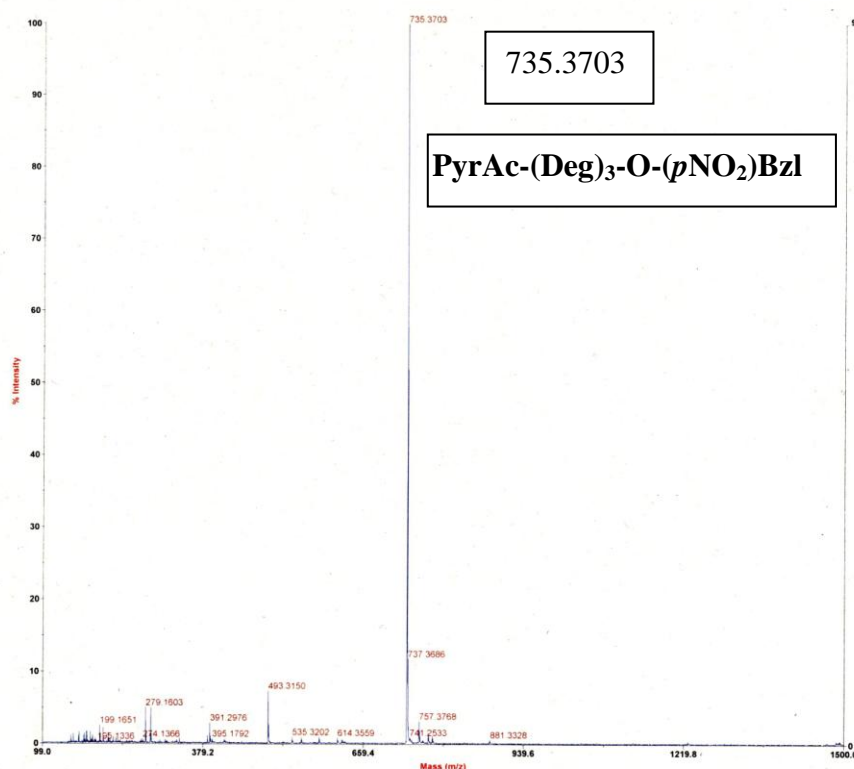

Acquired: May 30 13:55:00 2011  
 Mariner Mass Spectrum  
 L:\DATA\2011\maggio2011\30-05-2011\ale-5001.dat

Printed: 14:39, May 30, 2011

```

--> Mariner System State <--
Instrument State      POS
Ion Polarity         OFF
Auxiliary Gas        ON
Curtain Gas          ON
Nebulizer Gas        ON
Calibration Constant A 5.0032409E-007
Calibration Constant B 74.415621
TDC Deadtime         10
--> Source Settings <--
Spray Tip Potential   4308.40
SCIEX Heater         0.00
--> API Interface Settings <--
Nozzle Potential     90.09
Skimmer 1 Potential  11.01
Quadrupole DC Potential 4.00
Deflection Voltage   -0.10
Einzel Lens Potential -22.00
Quadrupole RF Voltage 999.76
Quadrupole Temperature 140.01
Nozzle Temperature   140.01
--> Analyzer Settings <--
Push Pulse Potential 485.01
Pull Pulse Potential 144.87
Pull Bias Potential   8.00
Acceleration Potential 3999.94
Reflector Potential   1549.99
Detector Voltage      1949.98
--> Spectrum Acquisition Settings <--
Seconds Per Spectrum 6.00
Ion Count Threshold   0.00
First Mass            100.00
Last Mass             4000.00
Accumulate Spectra   OFF
Standby at End of Acquisition OFF
--> Centroid Spectra Settings <--
Centroid Spectra     OFF
--> System Settings <--
Gas Control Mode     Manual
Syringe Pump Mode    Disabled
Min Analyzer Mass     50.00
Max Analyzer Mass     4000.00
    
```

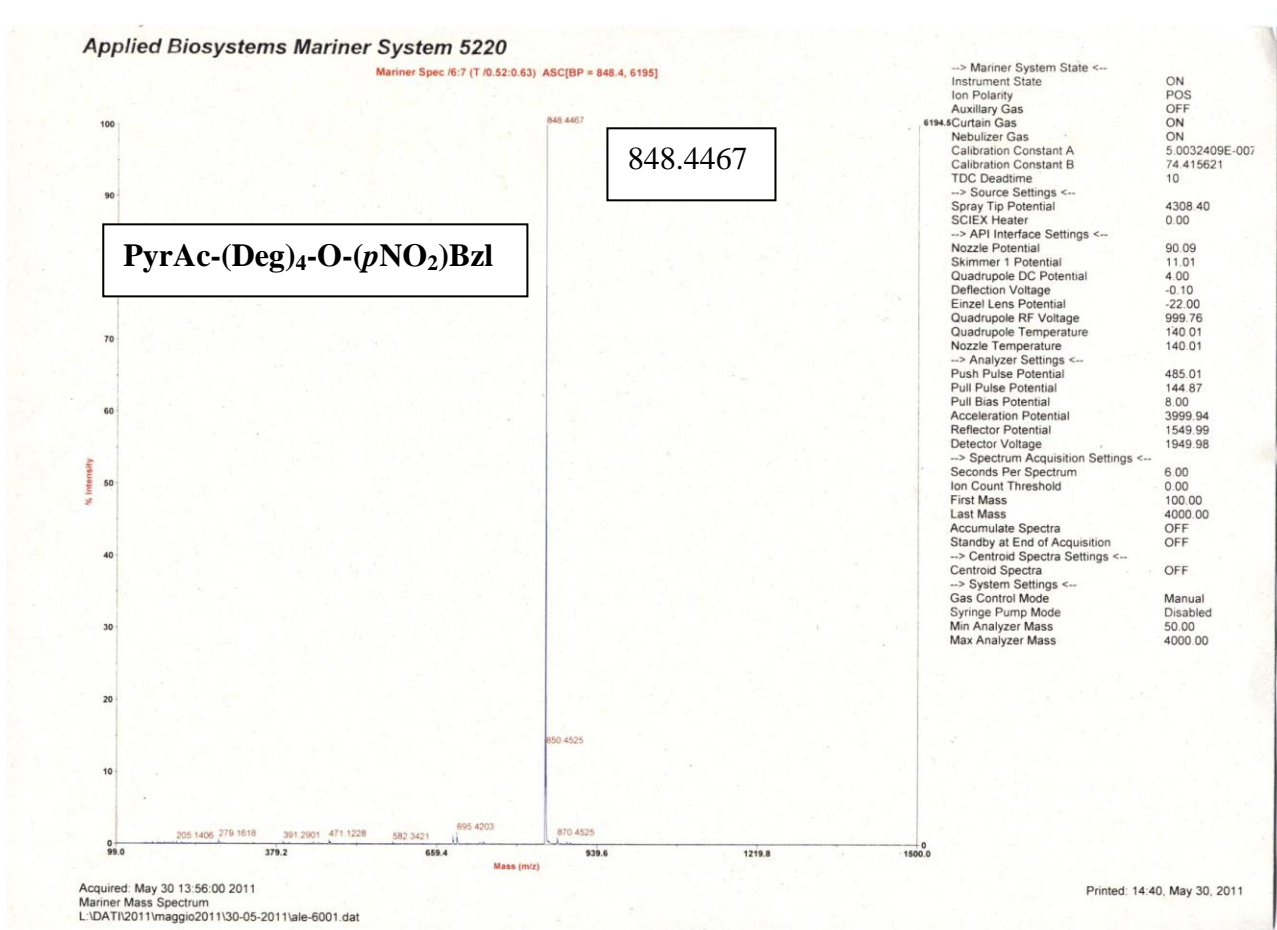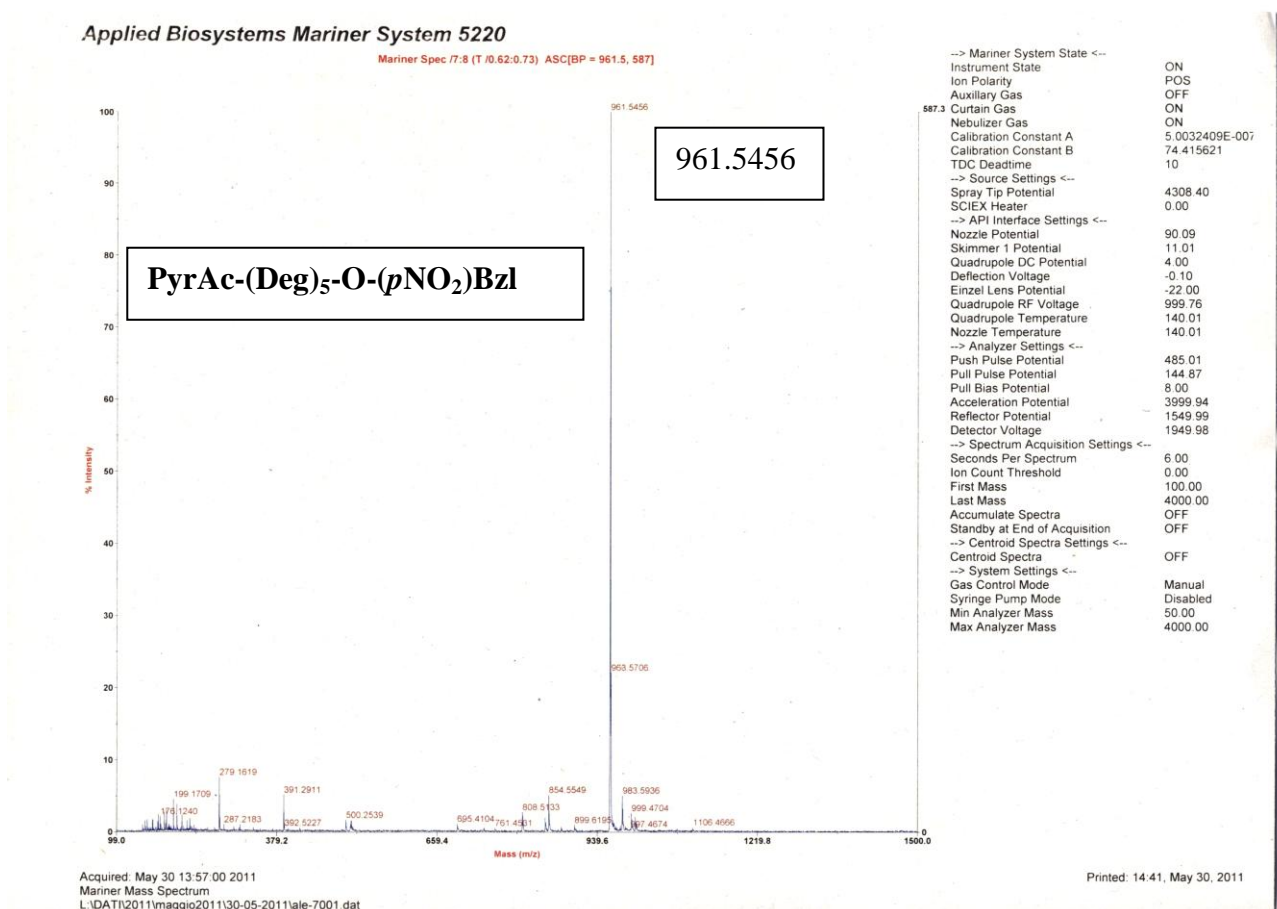

Applied Biosystems Mariner System 5220

Mariner Spec /6.8 (T /0.52:0.73) ASC[BP = 702.4, 19220]

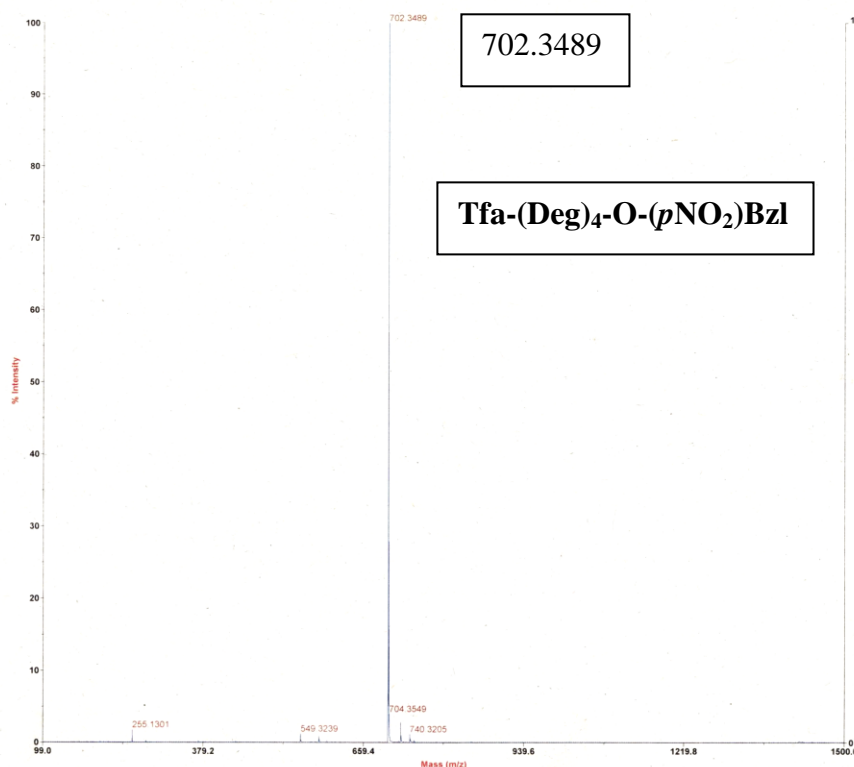

702.3489

Tfa-(Deg)<sub>4</sub>-O-(pNO<sub>2</sub>)Bzl

|                                       |                |
|---------------------------------------|----------------|
| --> Mariner System State <--          |                |
| Instrument State                      | ON             |
| Ion Polarity                          | POS            |
| Auxiliary Gas                         | OFF            |
| 1.9E+ Curtain Gas                     | ON             |
| Nebulizer Gas                         | ON             |
| Calibration Constant A                | 5.0032409E-007 |
| Calibration Constant B                | 74.415621      |
| TDC Deadtime                          | 10             |
| --> Source Settings <--               |                |
| Spray Tip Potential                   | 4308.40        |
| SCIEX Heater                          | 0.00           |
| --> API Interface Settings <--        |                |
| Nozzle Potential                      | 90.09          |
| Skimmer 1 Potential                   | 11.01          |
| Quadrupole DC Potential               | 4.00           |
| Deflection Voltage                    | -0.10          |
| Einzel Lens Potential                 | -22.00         |
| Quadrupole RF Voltage                 | 999.76         |
| Quadrupole Temperature                | 140.01         |
| Nozzle Temperature                    | 140.01         |
| --> Analyzer Settings <--             |                |
| Push Pulse Potential                  | 485.01         |
| Pull Pulse Potential                  | 144.87         |
| Pull Bias Potential                   | 8.00           |
| Acceleration Potential                | 3999.94        |
| Reflector Potential                   | 1549.99        |
| Detector Voltage                      | 1949.98        |
| --> Spectrum Acquisition Settings <-- |                |
| Seconds Per Spectrum                  | 6.00           |
| Ion Count Threshold                   | 0.00           |
| First Mass                            | 100.00         |
| Last Mass                             | 4000.00        |
| Accumulate Spectra                    | OFF            |
| Standby at End of Acquisition         | OFF            |
| --> Centroid Spectra Settings <--     |                |
| Centroid Spectra                      | OFF            |
| --> System Settings <--               |                |
| Gas Control Mode                      | Manual         |
| Syringe Pump Mode                     | Disabled       |
| Min Analyzer Mass                     | 50.00          |
| Max Analyzer Mass                     | 4000.00        |

Acquired: May 30 13:46:00 2011  
Mariner Mass Spectrum  
L:\DATI\2011\maggio2011\30-05-2011\ale-1001.dat

Printed: 14:36, May 30, 2011

Applied Biosystems Mariner System 5220

Mariner Spec /6.7 (T /0.52:0.63) ASC[BP = 821.4, 1551]

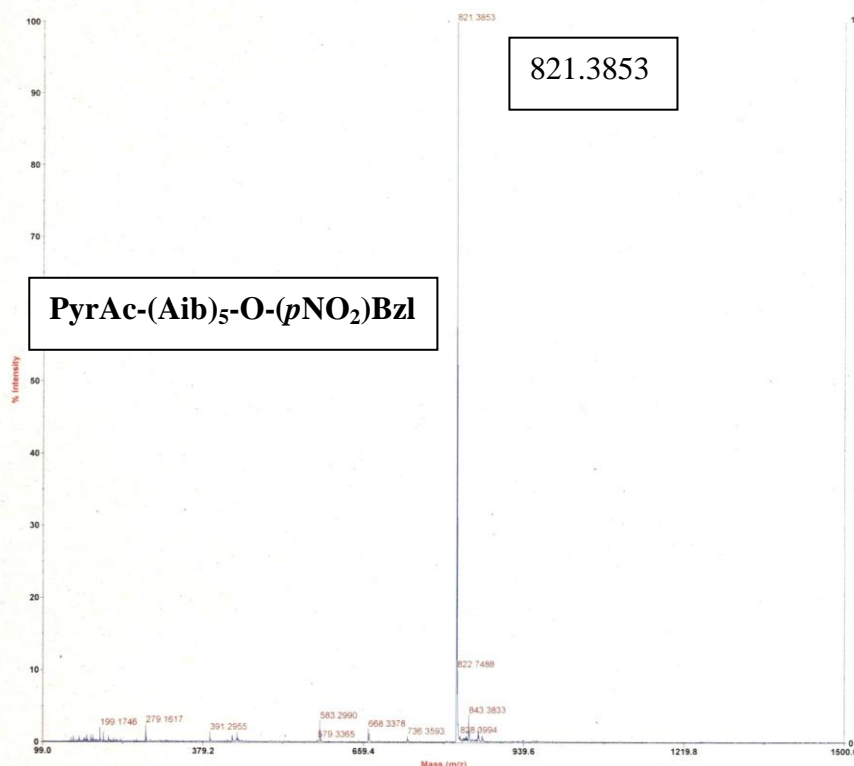

821.3853

PyrAc-(Aib)<sub>5</sub>-O-(pNO<sub>2</sub>)Bzl

|                                       |                |
|---------------------------------------|----------------|
| --> Mariner System State <--          |                |
| Instrument State                      | ON             |
| Ion Polarity                          | POS            |
| Auxiliary Gas                         | OFF            |
| 1.551E+ Curtain Gas                   | ON             |
| Nebulizer Gas                         | ON             |
| Calibration Constant A                | 5.0032409E-007 |
| Calibration Constant B                | 74.415621      |
| TDC Deadtime                          | 10             |
| --> Source Settings <--               |                |
| Spray Tip Potential                   | 4308.40        |
| SCIEX Heater                          | 0.00           |
| --> API Interface Settings <--        |                |
| Nozzle Potential                      | 90.09          |
| Skimmer 1 Potential                   | 11.01          |
| Quadrupole DC Potential               | 4.00           |
| Deflection Voltage                    | -0.10          |
| Einzel Lens Potential                 | -22.00         |
| Quadrupole RF Voltage                 | 999.76         |
| Quadrupole Temperature                | 140.01         |
| Nozzle Temperature                    | 140.01         |
| --> Analyzer Settings <--             |                |
| Push Pulse Potential                  | 485.01         |
| Pull Pulse Potential                  | 144.87         |
| Pull Bias Potential                   | 8.00           |
| Acceleration Potential                | 3999.94        |
| Reflector Potential                   | 1549.99        |
| Detector Voltage                      | 1949.98        |
| --> Spectrum Acquisition Settings <-- |                |
| Seconds Per Spectrum                  | 6.00           |
| Ion Count Threshold                   | 0.00           |
| First Mass                            | 100.00         |
| Last Mass                             | 4000.00        |
| Accumulate Spectra                    | OFF            |
| Standby at End of Acquisition         | OFF            |
| --> Centroid Spectra Settings <--     |                |
| Centroid Spectra                      | OFF            |
| --> System Settings <--               |                |
| Gas Control Mode                      | Manual         |
| Syringe Pump Mode                     | Disabled       |
| Min Analyzer Mass                     | 50.00          |
| Max Analyzer Mass                     | 4000.00        |

Acquired: May 30 13:59:00 2011  
Mariner Mass Spectrum  
L:\DATI\2011\maggio2011\30-05-2011\ale-8001.dat

Printed: 14:41, May 30, 2011
